# Supplementary material for: Pulmonary Microvascular Endothelial Antigen Presentation Activates Resident CD8⁺ T Cells to Restrain Influenza Lung Injury
Source: Research Square preprint supplement (doi:10.21203/rs.3.rs-7796497/v1), 2026-01-08
Supplement: Supplementary file 1 [file 4daac3d6168aadbd85c552f1.docx]

**Supplemental information**

**Methods**

**Lung tissue digestion and isolation of pulmonary ECs.** At 7 dpi, mice were euthanized, and lungs were perfused with 10 mL PBS to remove circulating blood cells. The perfused lungs were then minced and digested in a collagenase-DNase I solution containing 1 mg/mL Collagenase A (Roche, Cat# 10103578001) and 50 U/mL DNase I (Sigma-Aldrich, Cat# DN25) at 37°C for 60 minutes with gentle agitation to generate single-cell suspensions. Following digestion, the cell suspensions were filtered through a 70-μm cell strainer (Corning, Cat# 352350) to remove debris and centrifuged to collect cells. Red blood cells were lysed using ACK lysis buffer (Thermo Fisher Scientific, Cat# A1049201). Pulmonary endothelial cells (ECs) were enriched by magnetic-activated cell sorting (MACS) using CD31-conjugated microbeads (Miltenyi Biotec, Cat# 130-097-418) according to the manufacturer’s instructions. The isolated pulmonary ECs were either treated with TRIzol™ Reagent (Invitrogen, Cat# 15596026) for RNA extraction or lysed in RIPA buffer (Thermo Fisher Scientific, Cat# 89900) for protein analysis.

**Reverse transcription-quantitative PCR (RT-qPCR) analysis of host and viral gene expression.** qPCR was performed to assess viral and host gene expression. Total RNA was extracted from cultured or isolated lung ECs, or from homogenized lung tissues or PCLS using TRIzol™ Reagent (Invitrogen, Cat# 15596026) following the manufacturer’s instructions. First-strand cDNA synthesis was carried out using a High-Capacity cDNA Reverse Transcription Kit (Applied Biosystems, Cat# 4374967) with random hexamers. qPCR was performed using SYBR Green Master Mix (Applied Biosystems, Cat# 4309155) on a CFX96 Real-Time PCR Detection System (Bio-Rad), according to their protocols. Viral genes analyzed included NP, HA, NA, and M, while host gene expression was measured for MHC-I subunits (B2M and H-2kb in mice; B2M and HLA-A in humans) and IFN II signaling genes (Ifngr1, Jak1, Stat1, Irf1), with GAPDH as the internal control. Gene expression levels were calculated using the ΔΔCt method. All the primer used please see Table S1.

**Western Blot analysis**. Proteins were extracted from cultured PMVECs or lung-isolated ECs using RIPA buffer (Thermo Fisher) supplemented with protease (Thermo Fisher, Cat# 78430) and phosphatase (Thermo Fisher, Cat# 78428) inhibitor cocktails. Protein concentration was determined using the BCA Protein Assay Kit (Thermo Fisher, Cat# 23227). Equal amounts of protein were separated by SDS-PAGE and transferred onto PVDF membranes (Millipore, Cat# IPVH00010) using a semi-dry transfer system. Membranes were blocked with 5% non-fat milk in TBST and incubated overnight at 4°C with primary antibodies specific to B2M, MHCI (H2-kb for mice or HLA-ABC for humans), IAV proteins (HA and NA), and GAPDH (loading control). After washing, the membranes were incubated with HRP-conjugated secondary antibodies, and signals were visualized using enhanced chemiluminescence (ECL) substrate (Thermo Fisher, Cat# PI32106). Images were captured using a Bio-Rad ChemiDoc Imaging System, and band intensities were quantified using ImageJ software.

**Immunofluorescence.** H1N1-infected and uninfected PCLS samples were washed with PBS and fixed in 4% paraformaldehyde (PFA; Electron Microscopy Sciences, Cat#30525-89-4) for 1 hour at room temperature. Then the slices were washed three times with PBS, and incubated in blocking buffer (2.0% BSA Fraction V, 0.1% Triton-X, 0.1% Tween 20, and 0.1% Cold Water Fish Gelatin in 0.1M pH 7.4 PBS) for 1 hour. Slices were incubated overnight at 4°C with primary antibodies against human CD8 (BioLegend, rat origin, Cat# 344722), human CD31 (Bio-Rad, mouse origin, Cat# MCA1738), and viral HA proteins (Bio-techne, rabbit origin, Cat# MAB113961) diluted at 1:100. The next day, slices were stained with fluorophore-conjugated secondary antibodies: goat anti-rabbit IgG Alexa Fluor® 488 (Thermo Fisher, Cat# A-11001), goat anti-mouse IgG Alexa Fluor® 594 (Thermo Fisher, Cat# A-11032), and goat anti-rat IgG Alexa Fluor® 647 (Thermo Fisher, Cat# A-21247). All were diluted 1:1000 in blocking buffer and incubated for 1 hour at room temperature. After washing with PBS, tissues were stained with DAPI and mounted for imaging. Z-stack images were acquired using a Zeiss LSM 880 confocal microscope with Airyscan mode. Image processing, 3D reconstruction, and co-localization analysis of infected pulmonary ECs and CD8+ T cell were conducted.After euthanasia and perfusion, lungs from TdTomato reporter mice, H1N1- and H5N1-Cre infected and uninfected controls, were collected and fixed overnight in 4% PFA at 4°C. Following three washes with PBS on a rocker, the tissues were embedded in OCT compound (Sakura Finetek, Cat# 4583) and cryosectioned. The sections were permeabilized with 0.3% Triton X-100 (Sigma-Aldrich, Cat# X100) and blocked with 5% BSA (Sigma-Aldrich, Cat# A2153). They were then incubated overnight at 4°C with primary antibodies against mouse CD8 and CD31, diluted at 1:200. After washing, fluorophore-conjugated secondary antibodies including goat anti-rabbit IgG Alexa Fluor® 488 and goat anti-mouse IgG Alexa Fluor® 594 were applied, followed by nuclear staining with DAPI (Thermal Fisher, Cat# 62248). Confocal microscopy was used to examine the spatial interactions between CD8⁺ T cells and endothelial cells in lung tissue.

**Bulk RNA sequencing and analysis.** Lung ECs were isolated from TdTomatoEC: B2MEC-CKO and TdTomatoEC: B2Mfl/fl mice at baseline and 7 dpi, with three biological replicates per group. Lungs were digested into single-cell suspensions, and endothelial cells were sorted by flow cytometry as TdTomato⁺CD31⁺/CD45⁻. Sorted cells were immediately used for RNA extraction. Total RNA was isolated with TRIzol reagent Reagent (Invitrogen, Cat# 15596026) following the manufacturer’s instructions. RNA quality and concentration was checked with the Agilent TapeStation 4200 (Agilent, Cat# G2991BA), and Qubit 4 Fluorometer, respectively.RNA libraries were prepared with the Illumina Stranded mRNA Prep (PolyA⁺) kit (Illumina, Cat# 20040532). In brief, polyadenylated RNA was purified with oligo(dT) beads, fragmented, and converted into first-strand and double strand cDNA with random primers. After end repair, A-tailing, and adapter ligation, libraries were PCR-amplified, purified, and checked for quality on the TapeStation. Libraries were sequenced on an Illumina NextSeq 2000 using a P4 100-cycle kit (Illumina, Cat# 20100994), producing paired-end 2 × 58 bp reads. Each sample generated about 40 million reads, and all libraries were sequenced in the same batch to reduce technical variation. Raw reads were filtered with fastp and aligned to the reference mouse genome using HISAT2. Gene counts were obtained with featureCounts (Subread), and expression levels were normalized as FPKM. Differentially expressed genes (DEGs) were identified with DESeq2 (fold change > 2, adjusted p < 0.05). For comparisons without biological replicates, edgeR was also used. Enrichment analysis of up- and downregulated DEGs was performed with clusterProfiler, including Gene Ontology (GO) and (Kyoto Encyclopedia of Genes and Genomes) KEGG pathway analysis.

**CD8⁺ T cell isolation from mouse lung tissues and human PBMCs.** Mouse CD8⁺ T cells were isolated from lungs of H1N1-infected C57BL/6 mice at 7 dpi. After perfusion with PBS, lungs were minced and digested in collagenase A. Single-cell suspensions were filtered through a 70-μm strainer and red blood cells were lysed with ACK lysis buffer. The cells were resuspended in 2 mL RPMI 1640 medium and enriched using the EasySep™ Mouse CD8⁺ T Cell Isolation Kit (STEMCELL Technologies, Cat# 19853) following manufacturer’s instructions. Human CD8⁺ T cells were isolated from peripheral blood mononuclear cell (PBMC) packs purchased from commercial sources using the EasySep™ Human CD8⁺ T Cell Isolation Kit (STEMCELL Technologies, Cat# 17953) according to the manufacturer’s instructions. Briefly, PBMCs were washed, counted, and subjected to magnetic negative selection to enrich untouched CD8⁺ T cells. The resulting cells were immediately used for downstream experiments

**In-vitro co-culture assays.** To evaluate pulmonary EC antigen presentation and CD8⁺ T cell responses *in vitro*, mouse or human PMVECs were seeded into 12-well plates and then infected with H1N1 IAVs. For gene silencing, ECs were transfected with siRNA targeting B2M at 50 nM using Lipofectamine 2000 (Thermo Fisher, Cat# 13778075) 24 hours before viral infection. A control siRNA (Thermo Fisher, Cat# 4390844) with no target was used to rule out off-target effects. Knockdown efficiency was confirmed by qPCR and flow cytometry. In select conditions, ECs were pre-treated with anti–MHCI (10 µg/mL; Thermal Fisher, Cat# Y100) or anti–CD40 (10 µg/mL; Bio X Cell, Cat# BE0101) or recombinant IFNγ (10 ng/mL; murine: PeproTech, Cat# 485-MI; human: Thermal Fisher, Cat# 300-0) or with anti–Ifngr1 blocking antibody (10 µg/mL; Thermal Fisher, Cat# 16-1193-85) during viral infection. Corresponding isotype control antibodies (IgG2b, Thermal Fisher, Cat# MG2B00) were used in parallel.The isolated CD8⁺ T cells were labeled with CFSE (5 µM; Invitrogen, Cat# C34554) and co-cultured with H1N1-infected PMVECs at a 1:1 ratio. After co-culture of 72 hours, CD8⁺ T cell proliferation was assessed by CFSE dilution, and activation was determined by staining of CD8 ( Thermal Fisher, mouse, 58-0081-80; Biolegend, Cat# 344722), IFNγ (Thermal Fisher, mouse, Cat# 12-1191-82; Thermal Fisher, human, Cat# 12-1199-42), Granzyme B (Thermal Fisher, mouse/human, Cat# 35-8898-82; ), and CD69 (Biolegend, Cat# 104541) antibodies, followed by flow cytometric analysis.

**Flow Cytometry Analysis.** Before lung tissue collection, mice were perfused via the right ventricle with PBS containing 2 µg Brilliant Violet 785 anti-mouse CD45 antibody (BioLegend, Cat# 103149) per mouse to label and exclude circulating immune cells. Single-cell suspensions from lung tissues or cultured cells were then prepared as described above. To prevent nonspecific binding, cells were incubated with 1 µl Fc receptor blocking antibody in 100 µl PBS per sample for 10 minutes at room temperature: anti-CD16/CD32 (BioLegend, Cat# 533142) for mouse cells or anti-human Fc receptor blocker (BioLegend, Cat# 422301) for human cells. A viability dye, Zombie Aqua (BioLegend, Cat# 423101), was also included here to stain and exclude dead cells.Surface staining was carried out on single-cell suspensions with two panels of fluorochrome-conjugated antibodies targeting EC markers—such as CD31 (Thermal Fisher, mouse, Cat# 17-0311-82; human, Cat# 17-0319-42), CD45 (Thermal Fisher, mouse, Cat# 364-0459-42; human, Cat# 364-0459-42), CD54 (Thermal Fisher, mouse, Cat# MA5-28553; Biolegend, human, Cat# 353139), CD106 (Biolegend, mouse, Cat# 105720; Thermal Fisher, human, Cat# 25-1069-42), MHC-1 (Biolegend, mouse, Cat# 116514; Thermal Fisher, human, Cat# 12-9983-42), MHC-II (Biolegend, mouse, Cat# 107622; human, Cat# 327019) and CD40 (Thermal Fisher, mouse, Cat# 11-0402-81; human, Cat# 11-0409-42), and T cell markers, such as CD45 (Thermal Fisher, mouse, Cat# MA5-28553), CD3 (Biolegend, mouse, Cat# 100216), CD8α (Thermal Fisher, mouse, Cat# 58-0081-80), CD4 (Biolegend, mouse, Cat# 100531), and CD69 (Biolegend, mouse, Cat# 104541), diluted in FACS buffer consisting of PBS supplemented with 2% FBS and 2 mM EDTA. To specifically identify antigen-specific CD8⁺ T cells, tetramers loaded with IAV peptide of NP366-374 (ASNENMETM, gifted from NIH) for mice were added in T cell panel. Cells were incubated with the antibody cocktail for 30 minutes at 4°C. After incubation, cells were washed with FACS buffer.For intracellular cytokine staining of T cell panel, cells were pre-stimulated with phorbol 12-myristate 13-acetate (PMA, 50 ng/mL, sigma-aldrich, Cat# 52-440) and ionomycin (1 μg/mL, sigma-aldrich, Cat# 19657) in T cell medium at 4°C. After 1 hour, GolgiStop (BD Biosciences, Cat# 554715) and GolgiPlug (BD Biosciences, Cat# 555028) were added to prevent cytokine secretion, and cells were incubated for an additional 5 hours under the same conditions. Following stimulation, cells were washed with FACS buffer and stained for surface markers as described above. After surface staining, cells were fixed and permeabilized using the BD Cytofix/Cytoperm Kit (BD Biosciences, Cat# 554715) following the manufacturer’s instructions. Cells were then incubated with fluorochrome-conjugated antibodies against intracellular targets, such as IFNγ and Granzyme B, for 45 minutes at 4°C. After staining, cells were washed with permeabilization buffer. Data acquisition was performed on a BD LSRFortessa or similar flow cytometer with at least 100,000 events recorded per sample. The detailed information on fluorochrome-conjugated antibodies in this study was shown in Table S2. Data was analyzed using FlowJo software (v10.8 or later), using gating strategies to exclude dead cells, remove doublets, and identify cell populations.

**Histological analysis and lung injury scoring**. Lung tissues from C57BL/6, EC-B2M knockout, EC-B2M knock-in, and Ifngr1 knockout mice infected with H1N1 or H5N1 IAVs were collected at 7 dpi. Tissues were fixed in 4% PFA overnight at 4°C, embedded in paraffin, sectioned at 5 μm, and stained with hematoxylin and eosin (H&E) using standard protocol. Lung sections stained with H&E were scored for acute lung injury based on five features: neutrophil infiltration, hyaline membranes, protein debris, and septal thickening. Each was rated from 0 (none) to 2 (severe), and acute lung injury scores were summed and normalized to assess injury severity1.

Table s1 Primers for RT-qPCR

| **Primer name** | **Direction** | **Sequence (5′–3′)** |
| --- | --- | --- |
| Mouse H2-Kb | Forward | CGGCGCTGATCACCAAACA |
|  | Reverse | AGCGTCGCGTTCCCGTT |
| Mouse-B2m | Forward | GTTAAGCATGCCAGTATGGCCG |
|  | Reverse | TCATGATGCTTGATCACATGTCTCG |
| Mouse-Tap1 | Forward | GACTCCTTGCTCTCCACTCAGT |
|  | Reverse | AACGCTGTCACCGTTCCAGGAT |
| Mouse-CD40 | Forward | ACCAGCAAGGATTGCGAGGCAT |
|  | Reverse | GGATGACAGACGGTATCAGTGG |
| Human HLA-A | Forward | CTGCTGTGATGTGTAGGAGGAAG |
|  | Reverse | GCTGTGAGAGACACATCAGAGC |
| Human B2m | Forward | CCACTGAAAAAGATGAGTATGCCT |
|  | Reverse | CCAATCCAAATGCGGCATCTTC |
| Human Tap1 | Forward | GACTCCTTGCTCTCCACTCAGT |
|  | Reverse | AACGCTGTCACCGTTCCAGGAT |
| Mouse-Jak1 | Forward | CTGTCTACTCCATGAGCCAGCT |
|  | Reverse | CCTCATCCTTGTAGTCCAGCAG |
| Mouse Stat1 | Forward | GCCTCTCATTGTCACCGAAGAAC |
|  | Reverse | TGGCTGACGTTGGAGATCACCA |
| Mouse Irf1 | Forward | TCCAAGTCCAGCCGAGACACTA |
|  | Reverse | ACTGCTGTGGTCATCAGGTAGG |
| Mouse Ifngr1 | Forward | CTTGAACCCTGTCGTATGCTGG |
|  | Reverse | TTGGTGCAGGAATCAGTCCAGG |
| Mouse-ICAM1 | Forward | AAACCAGACCCTGGAACTGCAC |
|  | Reverse | GCCTGGCATTTCAGAGTCTGCT |
| Mouse VCAM1 | Forward | GCTATGAGGATGGAAGACTCTGG |
|  | Reverse | ACTTGTGCAGCCACCTGAGATC |
| Mouse Vwf | Forward | AACAGACGATGGTGGACTCAGC |
|  | Reverse | CGATGGACTCACAGGAGCAAGT |
| Mouse E-selectin | Forward | GGACACCACAAATCCCAGTCTG |
|  | Reverse | TCGCAGGAGAACTCACAACTGG |
| M-Influ A-NP | Forward | TGCTTCAAAACAGCCAAGTG |
|  | Reverse | GATGCCCTCTGTTGATTGGT |
| M-Influ A-NA | Forward | ACATCTGCAGTGGGGTTTTC |
|  | Reverse | ACCAATCAGTCATTGCCACA |
| M-Influ A-HA | Forward | GCTGCAGATGCAGACACAAT |
|  | Reverse | CCCTCAGCTCCTCATAGTCG |
| Mouse GAPDH | Forward | CATCACTGCCACCCAGAAGACTG |
|  | Reverse | ATGCCAGTGAGCTTCCCGTTCAG |
| Human GAPDH | Forward | GTCTCCTCTGACTTCAACAGCG |
|  | Reverse | ACCACCCTGTTGCTGTAGCCAA |

Reference

1 Kulkarni, H. S. *et al.* Update on the Features and Measurements of Experimental Acute Lung Injury in Animals: An Official American Thoracic Society Workshop Report. *Am J Respir Cell Mol Biol* **66**, e1-e14, doi:10.1165/rcmb.2021-0531ST (2022).
